# Supplementary material for: Separable roles of the DNA damage response kinase Mec1ATR and its activator Rad24RAD17 during meiotic recombination
Source: PubMed Central journal article supplement (PMC11658708; doi:10.1371/journal.pgen.1011485), 2024-12-09
Supplement: pgen.1011485.s001.pdf [file pgen.1011485.s001.pdf]

# Figure S1

Sequence genomic DNA from each member of a tetrad or octad

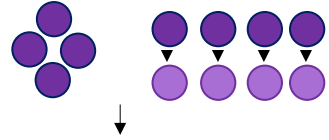

Align DNA to both parental genomes (S288c and SK1).  
Alignment is tolerant of mismatches

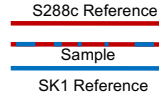

Genotype reads for each sample.  
Resolve separate parental calls into a binary signal

| Pos | Call1 | Call2 | Final |
|-----|-------|-------|-------|
| 1   | c     | -     | c     |
| 2   | c     | -     | c     |
| 3   | c     | -     | c     |
| 4   | k     | -     | k     |
| 5   | h     | h     | h     |
| 6   | k     | c     | -     |

c = S288c  
k = SK1  
h = heteroduplex  
- = discarded

Combine members of an octad/tetrad

| Pos | 1a | 1b | 2a | 2b | 3a | 3b | 4a | 4b |
|-----|----|----|----|----|----|----|----|----|
| 1   | c  | c  | k  | k  | k  | k  | c  | c  |
| 2   | c  | c  | k  | k  | k  | k  | h  | h  |
| 3   | c  | c  | h  | h  | k  | k  | c  | c  |
| 4   | k  | k  | c  | c  | k  | k  | c  | c  |
| 5   | k  | k  | c  | c  | k  | k  | c  | c  |

In *msh2Δ* tetrads, resolve heteroduplex calls

| Pos | 1a | 1b | 2a | 2b | 3a | 3b | 4a | 4b |
|-----|----|----|----|----|----|----|----|----|
| 1   | c  | c  | k  | k  | k  | k  | c  | c  |
| 2   | c  | c  | k  | k  | k  | k  | c  | c  |
| 3   | c  | c  | k  | c  | k  | k  | c  | c  |
| 4   | k  | k  | c  | c  | k  | k  | c  | c  |
| 5   | k  | k  | c  | c  | k  | k  | c  | c  |

Segment chromosomes into segregation pattern changes based on binarised calls

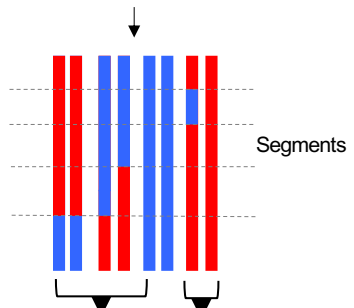

Group segregation pattern changes into events:  
CO if reciprocal exchange occurs  
NCO if not.

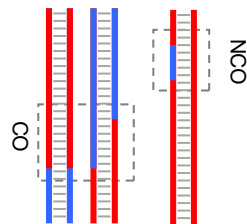

Manually examine events to categorize complex events
