# Supplementary material for: Separable roles of the DNA damage response kinase Mec1ATR and its activator Rad24RAD17 during meiotic recombination
Source: PubMed Central journal article supplement (PMC11658708; doi:10.1371/journal.pgen.1011485), 2024-12-09

# Figure S7

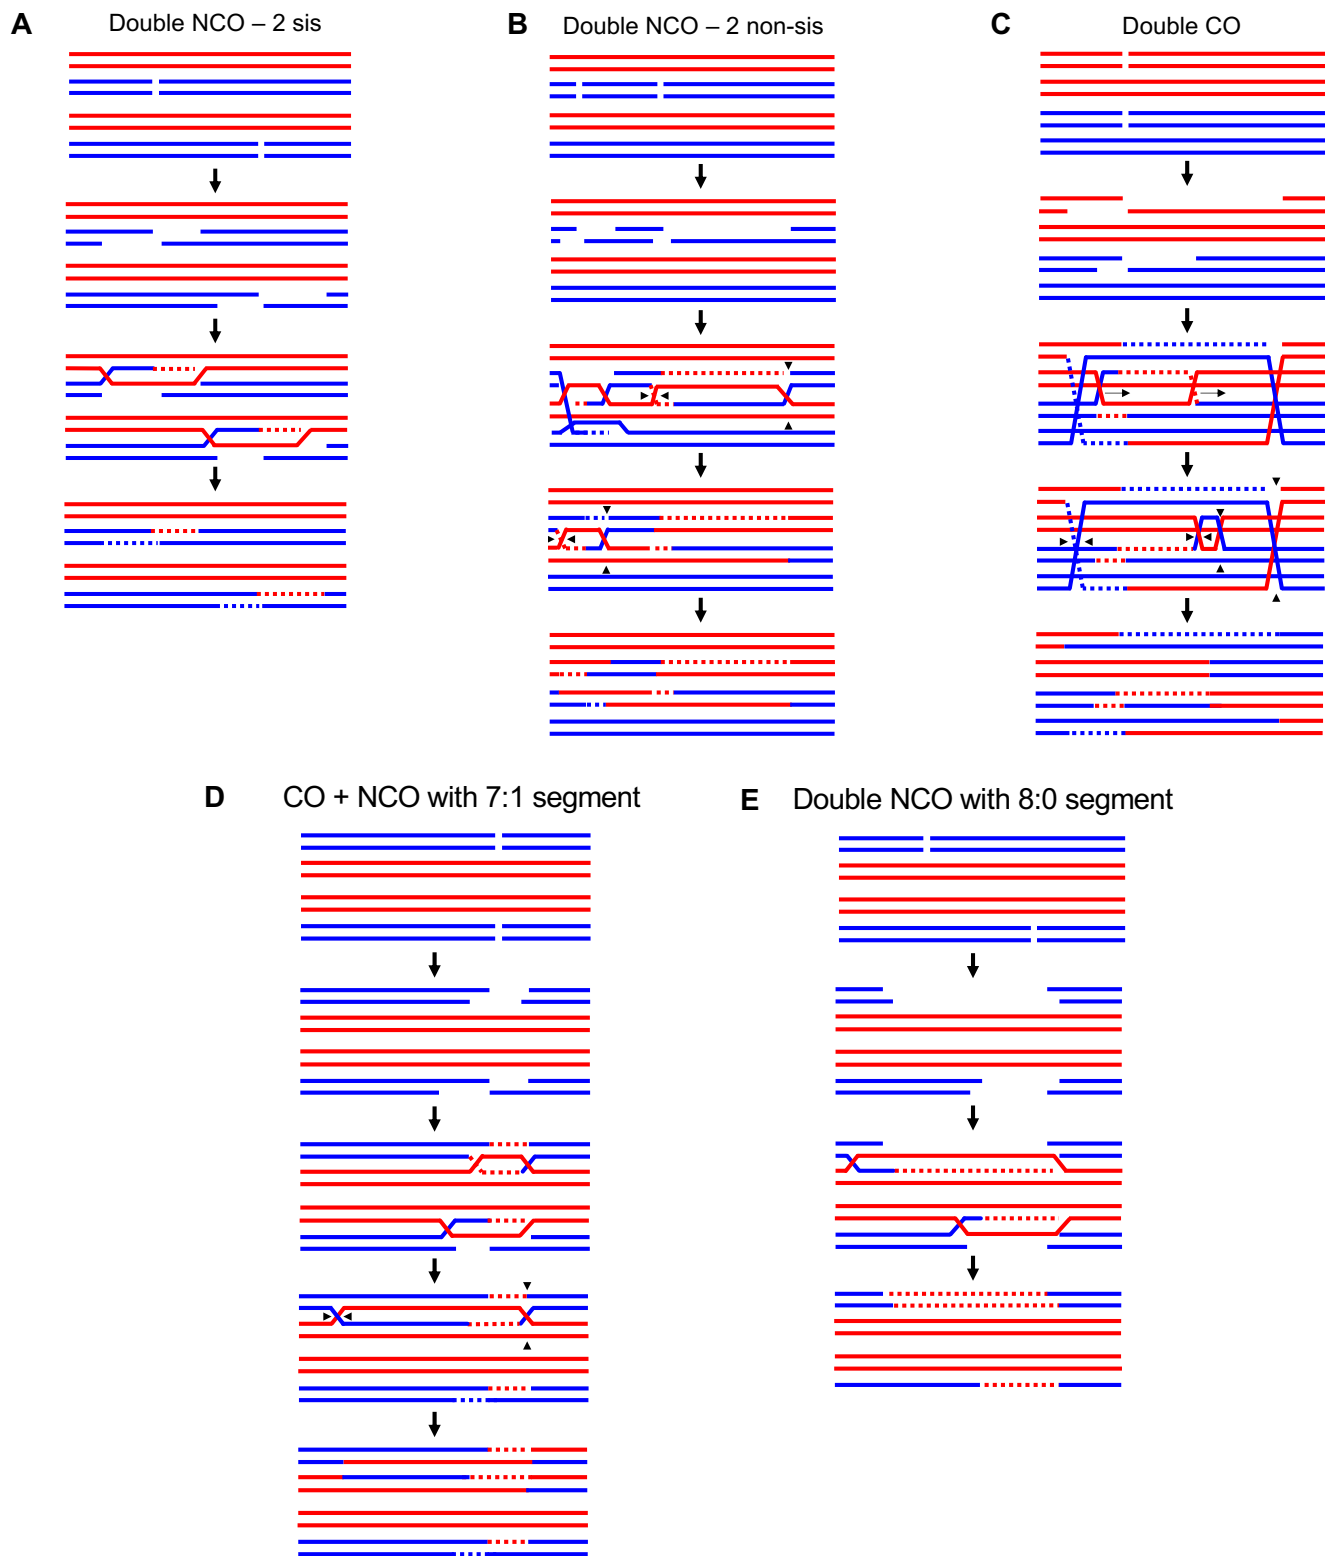

Supplement: pgen.1011485.s007.pdf [file pgen.1011485.s007.pdf]
