# Supplementary material for: Separable roles of the DNA damage response kinase Mec1ATR and its activator Rad24RAD17 during meiotic recombination
Source: PubMed Central journal article supplement (PMC11658708; doi:10.1371/journal.pgen.1011485), 2024-12-09

Figure S10

A

Full conversion

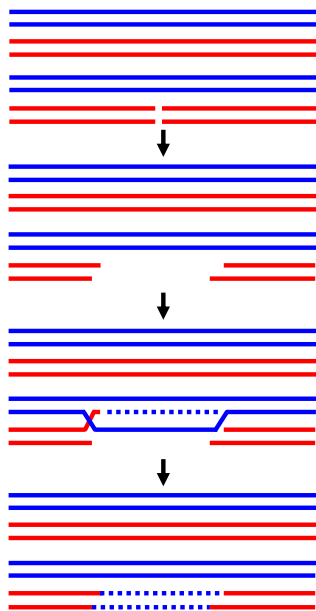

B

One-sided

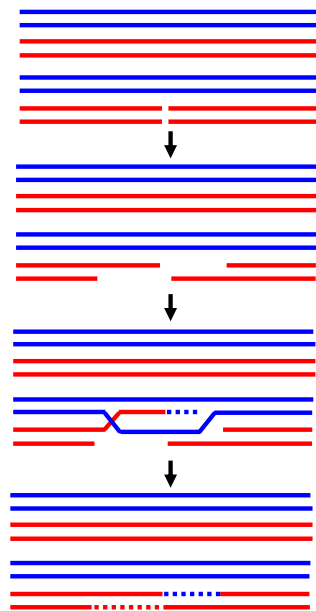

C

Two-sided

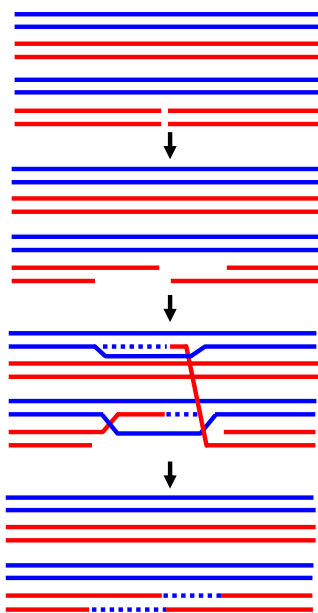

D

Two chr

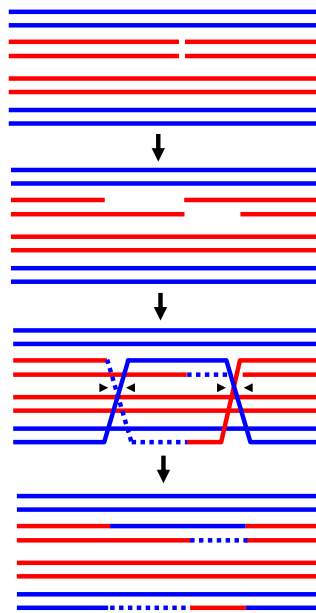

Supplement: pgen.1011485.s010.pdf [file pgen.1011485.s010.pdf]
