# Supplementary material for: Separable roles of the DNA damage response kinase Mec1ATR and its activator Rad24RAD17 during meiotic recombination
Source: PubMed Central journal article supplement (PMC11658708; doi:10.1371/journal.pgen.1011485), 2024-12-09
Supplement: pgen.1011485.s011.pdf [file pgen.1011485.s011.pdf]

# Figure S11

**A**

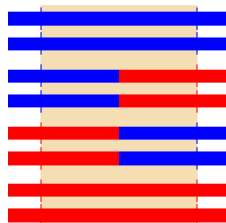

No strand transfer

**B**

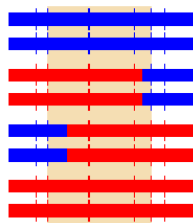

Full conversion

**C**

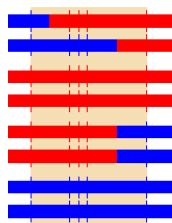

One-sided unidirectional

**D**

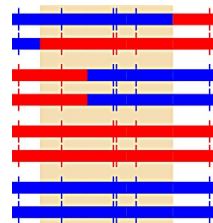

One-sided bidirectional

**E**

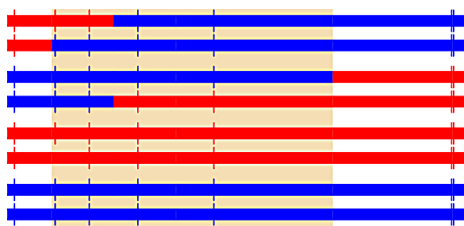

Two-sided unidirectional

**F**

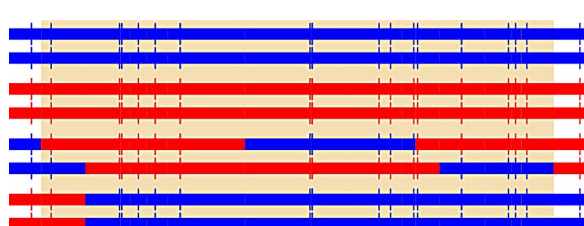

Two-sided bidirectional
