# Supplementary material for: Separable roles of the DNA damage response kinase Mec1ATR and its activator Rad24RAD17 during meiotic recombination
Source: PubMed Central journal article supplement (PMC11658708; doi:10.1371/journal.pgen.1011485), 2024-12-09
Supplement: pgen.1011485.s014.pdf [file pgen.1011485.s014.pdf]

# Figure S14

**A**

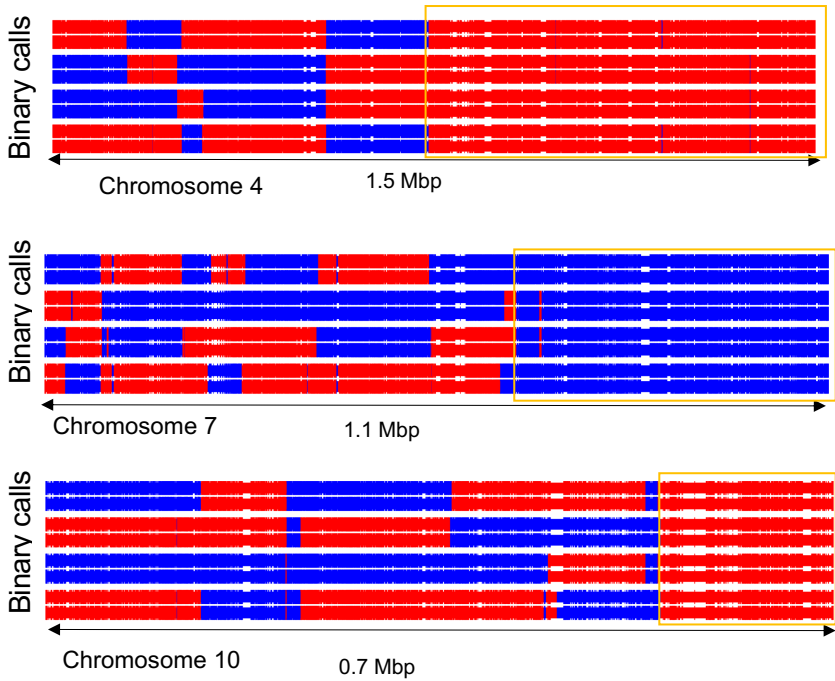

Two spores contain chromosomes where a substantial portion has been converted to the other parental genotype, suggesting a premeiotic recombination event.

**B**

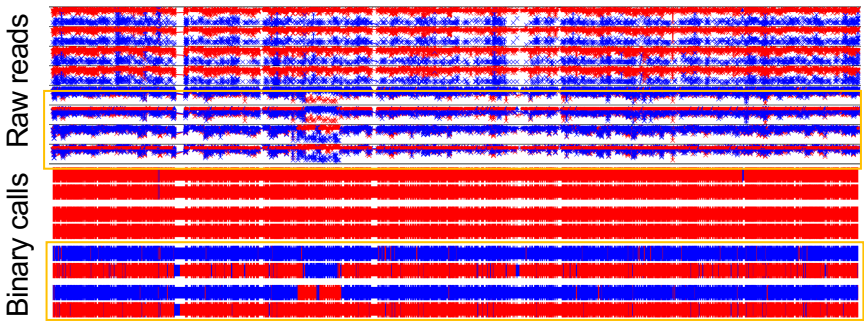

Presence of heteroduplex reads along whole length of chromosome, indicating that two spores have a copy of each parental chromosome, suggesting premeiotic duplication.
