# Supplementary material for: Separable roles of the DNA damage response kinase Mec1ATR and its activator Rad24RAD17 during meiotic recombination
Source: PubMed Central journal article supplement (PMC11658708; doi:10.1371/journal.pgen.1011485), 2024-12-09
Supplement: pgen.1011485.s015.pdf [file pgen.1011485.s015.pdf]

# Table S1

## S. cerevisiae spore viability measurements

| Genotype                        | Cross       | Background | Tetrads dissected | Mean spore viability | 95% confidence interval | Viability pattern |       |       |       |        |
|---------------------------------|-------------|------------|-------------------|----------------------|-------------------------|-------------------|-------|-------|-------|--------|
|                                 |             |            |                   |                      |                         | 4                 | 3     | 2     | 1     | 0      |
| WT                              | MJ512xMJ513 | SK1        | 64                | 96.9                 | 2.13                    | 92.19             | 3.13  | 4.69  | 0.00  | 0.00   |
| WT                              | MJ600xMJ631 | S288c      | 72                | 96.9                 | 2.01                    | 88.89             | 9.72  | 1.39  | 0.00  | 0.00   |
| WT                              | MJ600xMJ513 | SK1xS288c  | 197               | 82.0                 | 2.68                    | 53.81             | 27.41 | 14.21 | 2.03  | 2.54   |
| <i>msh2Δ</i>                    | MC25xMC26   | SK1        | 110               | 80.9                 | 3.67                    | 60.00             | 12.73 | 18.18 | 9.09  | 0.00   |
| <i>msh2Δ</i>                    | MC49xMC51   | S288c      | 105               | 77.9                 | 3.97                    | 47.62             | 26.67 | 18.10 | 4.76  | 2.86   |
| <i>msh2Δ</i>                    | MC49xMC26   | SK1xS288c  | 149               | 73.0                 | 3.56                    | 40.27             | 25.50 | 21.48 | 11.41 | 1.34   |
| <i>ndt80AR 8h</i>               | MJ846       | SK1        | 40                | 94.4                 | 3.57                    | 82.50             | 12.50 | 5.00  | 0.00  | 0.00   |
| <i>ndt80AR 10h</i>              | MJ43xMC42   | SK1xS288c  | 86                | 70.4                 | 4.83                    | 36.05             | 25.58 | 25.58 | 9.30  | 3.49   |
| <i>mec1-mn</i>                  | VG120xVG121 | SK1        | 130               | 58.5                 | 4.24                    | 21.54             | 32.31 | 15.38 | 20.00 | 10.77  |
| <i>mec1-mn</i>                  | MC152xMC153 | S288c      | 110               | 77.3                 | 3.92                    | 50.00             | 24.55 | 17.27 | 0.91  | 7.27   |
| <i>mec1-mn</i>                  | VG120xMC153 | SK1xS288c  | 153               | 6.4                  | 1.94                    | 1.31              | 0.65  | 4.58  | 9.15  | 84.31  |
| <i>mec1-nm msh2Δ</i>            | MC163xMC164 | SK1        | 88                | 49.2                 | 5.22                    | 19.32             | 23.86 | 14.77 | 18.18 | 23.86  |
| <i>mec1-nm msh2Δ</i>            | MC171xMC172 | S288c      | 111               | 63.1                 | 4.49                    | 30.63             | 25.23 | 19.82 | 14.41 | 9.91   |
| <i>mec1-nm msh2Δ</i>            | MC163xMC172 | SK1xS288c  | 176               | 28.8                 | 3.35                    | 3.41              | 10.80 | 17.61 | 34.09 | 34.09  |
| <i>mec1-mn ndt80AR 3h</i>       | MC2xMC3     | SK1        | 88                | 49.2                 | 5.22                    | 12.50             | 28.41 | 18.18 | 25.00 | 15.91  |
| <i>mec1-mn ndt80AR 6h</i>       | MC2xMC3     | SK1        | 86                | 54.1                 | 5.27                    | 19.77             | 23.26 | 23.26 | 20.93 | 12.79  |
| <i>mec1-mn ndt80AR 8h</i>       | MC2xMC3     | SK1        | 84                | 57.7                 | 5.28                    | 17.86             | 30.95 | 25.00 | 16.67 | 9.52   |
| <i>mec1-mn ndt80AR 10h</i>      | MC2xMC3     | SK1        | 86                | 48.6                 | 5.28                    | 12.79             | 19.77 | 30.23 | 23.26 | 13.95  |
| <i>mec1-mn ndt80AR 4h</i>       | MC2xMC198   | SK1xS288c  | 64                | 10.2                 | 3.70                    | 1.56              | 1.56  | 3.13  | 23.44 | 70.31  |
| <i>mec1-mn ndt80AR 6h</i>       | MC2xMC198   | SK1xS288c  | 63                | 18.3                 | 4.77                    | 0.00              | 6.35  | 14.29 | 25.40 | 53.97  |
| <i>mec1-mn ndt80AR 8h</i>       | MC2xMC198   | SK1xS288c  | 87                | 16.4                 | 3.89                    | 2.30              | 4.60  | 9.20  | 24.14 | 59.77  |
| <i>mec1-mn ndt80AR 10h</i>      | MC2xMC198   | SK1xS288c  | 63                | 27.0                 | 5.48                    | 4.76              | 6.35  | 19.05 | 31.75 | 38.10  |
| <i>rad24Δ</i>                   | MC17xMC18   | SK1        | 132               | 21.6                 | 3.51                    | 7.58              | 5.30  | 17.42 | 5.30  | 64.39  |
| <i>rad24Δ</i>                   | MC19xMC20   | S288c      | 106               | 46.7                 | 4.75                    | 12.26             | 17.92 | 29.25 | 25.47 | 15.09  |
| <i>rad24Δ</i>                   | MC17xMC20   | SK1xS288c  | 240               | 0.7                  | 0.54                    | 0.00              | 0.00  | 0.00  | 2.92  | 97.08  |
| <i>rad24Δ msh2Δ</i>             | MC105xMC107 | SK1        | 107               | 21.6                 | 3.88                    | 7.58              | 5.30  | 17.42 | 5.30  | 64.39  |
| <i>rad24Δ msh2Δ</i>             | MC202xMC203 | S288c      | 102               | 28.2                 | 4.37                    | 2.94              | 11.76 | 18.63 | 28.43 | 38.24  |
| <i>rad24Δ msh2Δ</i>             | MC105xMC203 | SK1xS288c  | 462               | 5.9                  | 1.07                    | 1.30              | 2.38  | 8.87  | 21.00 | 66.45  |
| <i>rad24Δ ndt80AR 4h</i>        | MJ835xMC89  | SK1xS288c  | 91                | 1.9                  | 1.41                    | 0.00              | 0.00  | 2.20  | 3.30  | 94.51  |
| <i>rad24Δ ndt80AR 6h</i>        | MJ835xMC89  | SK1xS288c  | 93                | 6.7                  | 2.54                    | 0.00              | 4.30  | 1.08  | 11.83 | 82.80  |
| <i>rad24Δ ndt80AR 8h</i>        | MJ835xMC89  | SK1xS288c  | 218               | 7.9                  | 1.79                    | 0.46              | 0.92  | 4.59  | 17.89 | 76.15  |
| <i>rad24Δ ndt80AR 10h</i>       | MJ835xMC89  | SK1xS288c  | 269               | 15.9                 | 1.82                    | 1.86              | 2.60  | 13.38 | 17.84 | 64.31  |
| <i>rad24Δ ndt80AR 4h</i>        | MJ848       | SK1        | 44                | 31.8                 | 6.88                    | 4.55              | 18.18 | 20.45 | 13.64 | 43.18  |
| <i>rad24Δ ndt80AR 6h</i>        | MJ848       | SK1        | 66                | 42.8                 | 5.97                    | 9.09              | 15.15 | 36.36 | 16.67 | 22.73  |
| <i>rad24Δ ndt80AR 8h</i>        | MJ848       | SK1        | 84                | 59.2                 | 5.42                    | 15.48             | 26.19 | 28.57 | 25.00 | 4.76   |
| <i>rad24Δ ndt80AR 10h</i>       | MJ848       | SK1        | 59                | 69.1                 | 5.90                    | 35.59             | 22.03 | 28.81 | 10.17 | 3.39   |
| <i>rad24Δ smi1Δ</i>             | MC101xMC103 | SK1        | 102               | 41.7                 | 4.78                    | 18.63             | 13.73 | 21.57 | 7.84  | 38.24  |
| <i>rad24Δ smi1Δ</i>             | MC101xMC61  | SK1xBY474  | 196               | 4.7                  | 1.48                    | 0.51              | 0.51  | 4.08  | 7.14  | 87.76  |
| <i>mus81Δ</i>                   | MC214xMC215 | SK1        | 110               | 55.7                 | 4.64                    | 17.27             | 27.27 | 25.45 | 20.91 | 9.09   |
| <i>mlh3Δ</i>                    | MC254xMC255 | SK1        | 110               | 89.1                 | 2.91                    | 81.82             | 3.64  | 9.09  | 0.00  | 5.45   |
| <i>mus81Δ mlh3Δ</i>             | MC271xMC272 | SK1        | 107               | 59.6                 | 4.65                    | 26.17             | 28.04 | 19.63 | 10.28 | 15.89  |
| <i>mec1-mn mus81Δ</i>           | MC243xMC242 | SK1        | 108               | 20.4                 | 3.80                    | 1.85              | 3.70  | 14.81 | 33.33 | 46.30  |
| <i>mec1-mn mlh3Δ</i>            | MC303xMC304 | SK1        | 117               | 49.6                 | 4.50                    | 22.22             | 14.53 | 23.08 | 19.66 | 20.51  |
| <i>mec1-mn mus81Δ mlh3Δ</i>     | MC333xMC334 | SK1        | 94                | 21.3                 | 4.10                    | 1.06              | 8.51  | 15.96 | 23.60 | 51.06  |
| <i>rad24Δ mus81Δ</i>            | MC222xMC223 | SK1        | 110               | 19.3                 | 3.69                    | 0.00              | 7.27  | 20.91 | 13.64 | 58.18  |
| <i>rad24Δ mus81Δ msh2Δ</i>      | MC292xMC297 | SK1xS288c  | 31                | 0.0                  | 0.00                    | 0.00              | 0.00  | 0.00  | 0.00  | 100.00 |
| <i>rad24Δ mlh3Δ</i>             | MC247xMC248 | SK1        | 109               | 20.6                 | 3.80                    | 6.42              | 3.67  | 13.76 | 18.35 | 57.80  |
| <i>rad24Δ mus81Δ mlh3Δ</i>      | MC257xMC258 | SK1        | 98                | 7.9                  | 2.67                    | 1.02              | 0.00  | 9.18  | 9.18  | 80.61  |
| <i>rad24Δ mus81Δ ndt80AR 4h</i> | MC288xMC289 | SK1        | 89                | 5.9                  | 2.45                    | 1.12              | 0.00  | 4.49  | 10.11 | 84.27  |
| <i>rad24Δ mus81Δ ndt80AR 8h</i> | MC288xMC289 | SK1        | 108               | 9.7                  | 2.79                    | 0.00              | 1.85  | 2.78  | 27.78 | 67.59  |
| <i>mus81Δ ndt80AR 4h</i>        | MC286xMC287 | SK1        | 128               | 34.0                 | 4.10                    | 6.25              | 10.94 | 23.44 | 31.25 | 28.13  |
| <i>mus81Δ ndt80AR 8h</i>        | MC286xMC287 | SK1        | 110               | 33.4                 | 4.41                    | 3.64              | 17.27 | 21.82 | 23.64 | 33.64  |
| <i>zip3Δ</i>                    | MC322xMC313 | SK1xS288c  | 106               | 46.2                 | 4.75                    | 13.21             | 18.87 | 31.13 | 13.21 | 23.58  |
| <i>zip3Δ msh2Δ</i>              | MC326xMC317 | SK1xS288c  | 177               | 35.9                 | 3.53                    | 7.34              | 12.99 | 28.25 | 18.64 | 32.77  |
