# Supplementary material for: Separable roles of the DNA damage response kinase Mec1ATR and its activator Rad24RAD17 during meiotic recombination
Source: PubMed Central journal article supplement (PMC11658708; doi:10.1371/journal.pgen.1011485), 2024-12-09
Supplement: pgen.1011485.s016.pdf [file pgen.1011485.s016.pdf]

Table S2

| Meiosis                     | Single COs | Single NCOs | Double COs | Double NCOs | CO and NCO | Chromosomes without a CO | Chromosomes without an NCO | 8:0 segregation | 7:1 segregation |
|-----------------------------|------------|-------------|------------|-------------|------------|--------------------------|----------------------------|-----------------|-----------------|
| <i>Wild type 1</i>          | 65         | 32          | 0          | 2           | 3          | Chr 1,6                  | Chr 1,3,6                  | 1               | NA              |
| <i>Wild type 2</i>          | 80         | 37          | 0          | 1           | 3          | Chr 1                    | Chr 6                      | 0               | NA              |
| <i>Wild type 3</i>          | 72         | 32          | 0          | 2           | 4          | -                        | Chr 2,3                    | 1               | NA              |
| <i>Wild type 4</i>          | 68         | 30          | 0          | 2           | 3          | -                        | Chr 1,5,6,12               | 1               | NA              |
| <i>Wild type 5</i>          | 70         | 28          | 0          | 0           | 1          | Chr 1                    | Chr 3,5,8                  | 0               | NA              |
| <i>Wild type 6</i>          | 75         | 16          | 1          | 1           | 2          | -                        | Chr 6,7,9,10,11            | 4               | NA              |
| <i>msh2Δ 1</i>              | 109        | 91          | 0          | 3           | 7          | -                        | -                          | 0               | 0               |
| <i>msh2Δ 2</i>              | 94         | 117         | 0          | 1           | 6          | -                        | -                          | 0               | 0               |
| <i>msh2Δ 3</i>              | 90         | 83          | 0          | 6           | 5          | -                        | -                          | 0               | 0               |
| <i>msh2Δ 4</i>              | 93         | 82          | 1          | 3           | 10         | -                        | -                          | 0               | 1               |
| <i>msh2Δ 5</i>              | 98         | 77          | 0          | 1           | 0          | -                        | Chr 6                      | 0               | 0               |
| <i>msh2Δ 6</i>              | 113        | 60          | 1          | 2           | 1          | -                        | Chr 1,7                    | 1               | 0               |
| <i>msh2Δ 7</i>              | 88         | 121         | 0          | 4           | 10         | -                        | -                          | 0               | 1               |
| <i>msh2Δ 8</i>              | 98         | 96          | 0          | 4           | 9          | -                        | Chr 6                      | 0               | 2               |
| <i>msh2Δ 9</i>              | 103        | 79          | 0          | 1           | 7          | -                        | -                          | 0               | 0               |
| <i>ndt80AR 1</i>            | 66         | 30          | 0          | 0           | 4          | -                        | -                          | 1               | NA              |
| <i>ndt80AR 2</i>            | 82         | 35          | 1          | 1           | 6          | -                        | Chr 3                      | 1               | NA              |
| <i>ndt80AR 3</i>            | 107        | 55          | 2          | 3           | 6          | -                        | Chr 3                      | 5               | NA              |
| <i>ndt80AR 4</i>            | 103        | 59          | 1          | 2           | 3          | -                        | -                          | 3               | NA              |
| <i>ndt80AR 5</i>            | 106        | 41          | 0          | 2           | 2          | -                        | -                          | 1               | NA              |
| <i>ndt80AR 6</i>            | 89         | 49          | 1          | 6           | 2          | -                        | Chr 5                      | 2               | NA              |
| <i>ndt80AR 7</i>            | 74         | 39          | 1          | 1           | 0          | -                        | Chr 2,13                   | 0               | NA              |
| <i>ndt80AR 8</i>            | 98         | 52          | 1          | 4           | 8          | -                        | -                          | 3               | NA              |
| <i>msh2Δ ndt80AR 1</i>      | 82         | 56          | 2          | 5           | 6          | -                        | Chr 3                      | 1               | 1               |
| <i>msh2Δ ndt80AR 2</i>      | 106        | 94          | 1          | 4           | 14         | -                        | -                          | 1               | 2               |
| <i>msh2Δ ndt80AR 3</i>      | 91         | 72          | 0          | 2           | 6          | -                        | -                          | 0               | 0               |
| <i>msh2Δ ndt80AR 4</i>      | 80         | 94          | 0          | 3           | 1          | -                        | -                          | 0               | 0               |
| <i>msh2Δ ndt80AR 5</i>      | 84         | 79          | 0          | 1           | 3          | -                        | -                          | 0               | 0               |
| <i>msh2Δ ndt80AR 6</i>      | 95         | 99          | 2          | 3           | 17         | -                        | -                          | 1               | 4               |
| <i>mec1-mn 1</i>            | 58         | 24          | 2          | 4           | 6          | Chr 2                    | Chr 2                      | 8               | NA              |
| <i>mec1-mn 2</i>            | 82         | 59          | 3          | 11          | 14         | Chr 1                    | Chr 1                      | 20              | NA              |
| <i>mec1-mn msh2Δ 1 *</i>    | 59         | 134         | 1          | 4           | 7          | Chr 8                    | Chr 8                      | 1               | 1               |
| <i>mec1-mn msh2Δ 2</i>      | 122        | 172         | 0          | 16          | 23         | -                        | -                          | 4               | 6               |
| <i>mec1-mn msh2Δ 3 #</i>    | 109        | 119         | 0          | 8           | 27         | -                        | Chr 1                      | 1               | 3               |
| <i>mec1-mn msh2Δ 4</i>      | 116        | 152         | 3          | 16          | 23         | -                        | -                          | 3               | 5               |
| <i>mec1-mn msh2Δ 5</i>      | 131        | 126         | 2          | 18          | 27         | -                        | -                          | 5               | 4               |
| <i>mec1-mn msh2Δ 6</i>      | 118        | 214         | 3          | 25          | 30         | -                        | -                          | 5               | 10              |
| <i>mec1-mn ndt80AR 1</i>    | 155        | 88          | 2          | 9           | 37         | -                        | -                          | 21              | NA              |
| <i>mec1-mn ndt80AR 2</i>    | 89         | 37          | 1          | 4           | 6          | -                        | -                          | 9               | NA              |
| <i>mec1-mn ndt80AR 3</i>    | 109        | 54          | 2          | 6           | 22         | -                        | -                          | 15              | NA              |
| <i>mec1-mn ndt80AR 4</i>    | 87         | 60          | 3          | 3           | 13         | -                        | Chr 14                     | 7               | NA              |
| <i>mec1-mn ndt80AR 5</i>    | 112        | 71          | 2          | 17          | 35         | -                        | -                          | 32              | NA              |
| <i>mec1-mn ndt80AR 6*</i>   | 59         | 34          | 6          | 3           | 4          | Chr 1                    | Chr 3,4                    | 11              | NA              |
| <i>rad24Δ msh2Δ 1</i>       | 50         | 42          | 0          | 0           | 4          | Chr 5,15                 | Chr 5                      | 0               | 0               |
| <i>rad24Δ msh2Δ 2</i>       | 68         | 76          | 1          | 9           | 16         | Chr 1                    | Chr 1,6                    | 2               | 4               |
| <i>rad24Δ msh2Δ 3</i>       | 90         | 110         | 0          | 12          | 14         | -                        | -                          | 2               | 5               |
| <i>rad24Δ msh2Δ 4</i>       | 76         | 96          | 1          | 10          | 4          | Chr 6,8                  | -                          | 0               | 0               |
| <i>rad24Δ msh2Δ 5</i>       | 88         | 69          | 1          | 5           | 12         | Chr 8                    | -                          | 0               | 1               |
| <i>rad24Δ msh2Δ 6 #</i>     | 66         | 91          | 0          | 8           | 6          | -                        | Chr 3                      | 1               | 1               |
| <i>rad24Δ ndt80AR 1</i>     | 112        | 60          | 3          | 12          | 28         | -                        | -                          | 17              | NA              |
| <i>rad24Δ ndt80AR 2</i>     | 117        | 38          | 3          | 7           | 16         | -                        | -                          | 7               | NA              |
| <i>rad24Δ ndt80AR 3</i>     | 83         | 42          | 6          | 8           | 12         | Chr 6                    | Chr 1,3,6                  | 7               | NA              |
| <i>rad24Δ ndt80AR 4</i>     | 128        | 81          | 2          | 13          | 23         | -                        | -                          | 13              | NA              |
| <i>rad24Δ ndt80AR 5</i>     | 79         | 32          | 0          | 6           | 8          | Chr 6                    | Chr 6                      | 6               | NA              |
| <i>rad24Δ ndt80AR 6</i>     | 85         | 56          | 4          | 22          | 20         | -                        | -                          | 6               | NA              |
| <i>rad24Δ sml1Δ</i>         | 25         | 6           | 2          | 2           | 5          | Chr 1,5,8,11,12,14       | Chr 1,5,7,8,9,11,12,14,15  | 8               | NA              |
| <i>rad24Δ msh2Δ sml1Δ 1</i> | 70         | 97          | 0          | 13          | 14         | Chr 3                    | -                          | 2               | 1               |
| <i>rad24Δ msh2Δ sml1Δ 2</i> | 58         | 40          | 0          | 6           | 3          | Chr 3,8                  | Chr 1,3                    | 1               | 0               |
| <i>sml1Δ 1</i>              | 66         | 40          | 0          | 1           | 1          | -                        | Chr 1,12                   | 2               | NA              |
| <i>sml1Δ 2</i>              | 80         | 26          | 0          | 1           | 2          | -                        | Chr 1,9,14                 | 2               | NA              |
| <i>zip3Δ 1</i>              | 61         | 76          | 1          | 7           | 4          | Chr 3                    | -                          | 2               | NA              |
| <i>zip3Δ 2</i>              | 43         | 84          | 0          | 6           | 3          | Chr 12                   | -                          | 4               | NA              |
| <i>zip3Δ 3</i>              | 47         | 86          | 0          | 5           | 8          | Chr 1                    | -                          | 2               | NA              |
| <i>zip3Δ 4</i>              | 35         | 55          | 0          | 1           | 9          | Chr 6                    | Chr 5                      | 2               | NA              |
| <i>zip3Δ msh2Δ 1</i>        | 24         | 296         | 0          | 17          | 10         | Chr 1                    | -                          | 0               | 3               |
| <i>zip3Δ msh2Δ 2</i>        | 24         | 294         | 0          | 10          | 1          | Chr 9,16                 | -                          | 1               | 4               |
| <i>zip3Δ msh2Δ 3</i>        | 27         | 289         | 0          | 20          | 7          | Chr 15                   | -                          | 0               | 3               |
| <i>zip3Δ msh2Δ 4</i>        | 28         | 376         | 1          | 32          | 10         | -                        | -                          | 2               | 3               |
| <i>zip3Δ msh2Δ 5</i>        | 21         | 368         | 0          | 33          | 14         | Chr 3,4                  | -                          | 2               | 10              |
| <i>zip3Δ msh2Δ 6</i>        | 27         | 304         | 0          | 15          | 6          | Chr 11                   | -                          | 0               | 5               |
