# Supplementary material for: Separable roles of the DNA damage response kinase Mec1ATR and its activator Rad24RAD17 during meiotic recombination
Source: PubMed Central journal article supplement (PMC11658708; doi:10.1371/journal.pgen.1011485), 2024-12-09
Supplement: pgen.1011485.s017.pdf [file pgen.1011485.s017.pdf]

Table S3

| Strain | Background | Mat | Genotype                                                                                                                                         | Sequenced sample name            |
|--------|------------|-----|--------------------------------------------------------------------------------------------------------------------------------------------------|----------------------------------|
| MJ513  | SK1        | a   | <i>ho::LYS2 lys2Δ leu2 arg4Δ</i>                                                                                                                 | WT (TW)                          |
| MJ600  | S288c      | α   | <i>ade8Δ</i>                                                                                                                                     | WT (TW)                          |
| MJ43   | SK1        | α   | <i>ho::LYS2 lys2Δ arg4Δ leu2Δ::hisG trp1Δ::hisG his4XΔ::LEU2 nuc1Δ::LEU2 PGAL1-NDT80::TRP1 ura3::pGPD1-GAL4(848)-ER::URA3</i>                    | <i>ndt80AR</i> (TN)              |
| MC42   | S288c      | a   | <i>ade8Δ ndt80Δ::KanMX</i>                                                                                                                       | <i>ndt80AR</i> (TN)              |
| MC26   | SK1        | α   | <i>ho::LYS2 lys2Δ ura3Δ arg4 leu2 msh2Δ::KanMX</i>                                                                                               | <i>msh2Δ</i> (OM)                |
| MC49   | S288c      | a   | <i>ade8Δ msh2Δ::KanMX</i>                                                                                                                        | <i>msh2Δ</i> (OM)                |
| MC298  | SK1        | a   | <i>ho::LYS2 lys2Δ ura3Δ arg4 leu2 trp1Δ::hisG ura3Δ::PGPD1-GAL4(848)-ER::URA3 PGAL1-NDT80::TRP1 msh2Δ::KanMX</i>                                 | <i>msh2Δ ndt80AR</i> (OMN)       |
| MC300  | S288c      | α   | <i>ade8Δ ndt80Δ::KanMX msh2Δ::KanMX</i>                                                                                                          | <i>msh2Δ ndt80AR</i> (OMN)       |
| MC105  | SK1        | a   | <i>ho::LYS2 lys2Δ ura3Δ arg4 leu2 rad24Δ::HphMX4 msh2Δ::KanMX</i>                                                                                | <i>rad24Δ msh2Δ</i> (TRM)        |
| MC203  | S288c      | α   | <i>ade8Δ rad24Δ::HphMX4 msh2Δ::KanMX</i>                                                                                                         | <i>rad24Δ msh2Δ</i> (TRM)        |
| MC101  | SK1        | a   | <i>ho::LYS2 lys2Δ ura3Δ arg4 leu2 rad24Δ::HphMX4 sml1Δ::URA3</i>                                                                                 | <i>rad24Δ sml1Δ</i> (TRS)        |
| MC61   | BY4742     | α   | <i>lys2Δ his4 ura3Δ leu2Δ met15Δ sml1Δ::URA3 rad24Δ::HphMX4</i>                                                                                  | <i>rad24Δ sml1Δ</i> (TRS)        |
| MC163  | SK1        | a   | <i>ho::LYS2 lys2Δ ura3Δ arg4Δ leu2Δ::hisG nuc1Δ::LEU2 PCLB2-MEC1::KanMX msh2Δ::KanMX</i>                                                         | <i>mec1-mn msh2Δ</i> (TCMM)      |
| MC172  | S288c      | α   | <i>ade8Δ PCLB2-MEC1::KanMX4 msh2::HphMX4</i>                                                                                                     | <i>mec1-mn msh2Δ</i> (TCMM)      |
| MC2    | SK1        | a   | <i>ho::LYS2 lys2Δ arg4Δ leu2Δ::hisG his4XΔ::LEU2 nuc1Δ::LEU2 trp1Δ::hisG ura3Δ::PGPD1-GAL4(848)-ER::URA3 PCLB2-MEC1::KanMX PGAL1-NDT80::TRP1</i> | <i>mec1-mn ndt80AR</i> (TCMN)    |
| MC198  | S288c      | α   | <i>ade8Δ PCLB2-MEC1::KanMX4 ndt80Δ::KanMX</i>                                                                                                    | <i>mec1-mn ndt80AR</i> (TCMN)    |
| MJ835  | SK1        | α   | <i>ho::LYS2 lys2Δ arg4Δ leu2Δ::hisG trp1Δ::hisG his4XΔ::LEU2 nuc1Δ::LEU2 ura3Δ::PGPD1-GAL4(848)-ER::URA3 PGAL1-NDT80::TRP1 rad24Δ::hphMX</i>     | <i>rad24Δ ndt80AR</i> (TRN)      |
| MC89   | S288c      | a   | <i>ade8Δ rad24Δ::HphMX4 ndt80Δ::KanMX</i>                                                                                                        | <i>rad24Δ ndt80AR</i> (TRN)      |
| MC190  | SK1        | α   | <i>ho::LYS2 lys2Δ ura3Δ arg4 leu2 msh2Δ::Kan rad24Δ::HphMX4 sml1Δ::URA3</i>                                                                      | <i>rad24Δ msh2Δ sml1Δ</i> (TRMS) |
| MC193  | BY4741     | a   | <i>ura3Δ his4Δ leu2Δ met15Δ msh2Δ::Kan rad24Δ::HphMX4 sml1Δ::URA3</i>                                                                            | <i>rad24Δ msh2Δ sml1Δ</i> (TRMS) |
| MC37   | BY4742     | α   | <i>ura3Δ his4Δ leu2Δ met15Δ sml1Δ::URA3</i>                                                                                                      | <i>sml1Δ</i> (TS)                |
| MC113  | SK1        | a   | <i>ho::LYS2 lys2Δ ura3Δ arg4 leu2 sml1Δ::URA3</i>                                                                                                | <i>sml1Δ</i> (TS)                |
| MC313  | S288c      | a   | <i>ade8Δ zip3Δ::HphMX4</i>                                                                                                                       | <i>zip3Δ</i> (TZ)                |
| MC322  | SK1        | α   | <i>ho::LYS2 lys2Δ ura3Δ arg4 leu2 zip3Δ::HphMX4</i>                                                                                              | <i>zip3Δ</i> (TZ)                |
| MC317  | S288c      | a   | <i>ade8Δ msh2Δ::Kan zip3Δ::HphMX4</i>                                                                                                            | <i>zip3Δ msh2Δ</i> (TMZ)         |
| MC326  | SK1        | α   | <i>ho::LYS2 lys2Δ ura3Δ arg4 leu2 msh2Δ::Kan zip3Δ::HphMX4</i>                                                                                   | <i>zip3Δ msh2Δ</i> (TMZ)         |
