# Supplementary material for: Separable roles of the DNA damage response kinase Mec1ATR and its activator Rad24RAD17 during meiotic recombination
Source: PubMed Central journal article supplement (PMC11658708; doi:10.1371/journal.pgen.1011485), 2024-12-09
Supplement: pgen.1011485.s018.pdf [file pgen.1011485.s018.pdf]

# Table S4

| Strain      | Background | Genotype                                                                                                                                                                                                                                                                                                                    |
|-------------|------------|-----------------------------------------------------------------------------------------------------------------------------------------------------------------------------------------------------------------------------------------------------------------------------------------------------------------------------|
| MJ512xMJ513 | SK1        | <i>ho::LYS2<sup>r</sup> lys2Δ<sup>r</sup> leu2<sup>r</sup> arg4<sup>r</sup> ura3Δ/URA3</i>                                                                                                                                                                                                                                  |
| MJ600xMJ631 | S288c      | <i>ade8Δ<sup>r</sup></i>                                                                                                                                                                                                                                                                                                    |
| MC25xMC26   | SK1        | <i>ho::LYS2<sup>r</sup> lys2Δ<sup>r</sup> arg4<sup>r</sup> leu2<sup>r</sup> msh2Δ::KanMX6<sup>r</sup></i>                                                                                                                                                                                                                   |
| MC51xMC49   | S288c      | <i>ade8Δ<sup>r</sup> msh2Δ::KanMX6<sup>r</sup></i>                                                                                                                                                                                                                                                                          |
| MC214xMC215 | SK1        | <i>ho::LYS2<sup>r</sup> lys2Δ<sup>r</sup> ura3Δ<sup>r</sup> arg4<sup>r</sup> leu2<sup>r</sup> mus81Δ::KanMX6<sup>r</sup></i>                                                                                                                                                                                                |
| MC230xMC231 | SK1        | <i>ho::LYS2<sup>r</sup> lys2Δ<sup>r</sup> ura3Δ<sup>r</sup> arg4<sup>r</sup> leu2<sup>r</sup> mus81Δ::KanMX6<sup>r</sup> msh2Δ::KanMX6<sup>r</sup></i>                                                                                                                                                                      |
| MC254xMC255 | SK1        | <i>ho::LYS2<sup>r</sup> lys2Δ<sup>r</sup> ura3Δ<sup>r</sup> arg4<sup>r</sup> mlh3Δ::KanMX6<sup>r</sup></i>                                                                                                                                                                                                                  |
| MC271xMC272 | SK1        | <i>ho::LYS2<sup>r</sup> lys2Δ<sup>r</sup> ura3Δ<sup>r</sup> arg4<sup>r</sup> mlh3Δ::KanMX6<sup>r</sup> mus81Δ::KanMX6<sup>r</sup></i>                                                                                                                                                                                       |
| MC17xMC18   | SK1        | <i>ho::LYS2<sup>r</sup> lys2Δ<sup>r</sup> arg4<sup>r</sup> leu2<sup>r</sup> rad24Δ::HphMX4<sup>r</sup></i>                                                                                                                                                                                                                  |
| MC19xMC20   | S288c      | <i>ade8Δ<sup>r</sup> rad24Δ::HphMX4<sup>r</sup></i>                                                                                                                                                                                                                                                                         |
| MC107xMC105 | SK1        | <i>ho::LYS2<sup>r</sup> lys2Δ<sup>r</sup> ura3Δ<sup>r</sup> arg4<sup>r</sup> leu2<sup>r</sup> rad24Δ::HphMX4<sup>r</sup> msh2Δ::KanMX6<sup>r</sup></i>                                                                                                                                                                      |
| MC202xMC203 | S288c      | <i>ade8Δ<sup>r</sup> rad24Δ::HphMX4<sup>r</sup> msh2Δ::KanMX6<sup>r</sup></i>                                                                                                                                                                                                                                               |
| MC223xMC222 | SK1        | <i>ho::LYS2<sup>r</sup> lys2Δ<sup>r</sup> ura3Δ<sup>r</sup> arg4<sup>r</sup> leu2<sup>r</sup> mus81Δ::KanMX6<sup>r</sup> rad24::hphMX<sup>r</sup></i>                                                                                                                                                                       |
| MC247xMC248 | SK1        | <i>ho::LYS2<sup>r</sup> lys2Δ<sup>r</sup> ura3Δ<sup>r</sup> arg4<sup>r</sup> rad24Δ::HphMX4<sup>r</sup> mlh3Δ::KanMX6<sup>r</sup></i>                                                                                                                                                                                       |
| MC257xMC258 | SK1        | <i>ho::LYS2<sup>r</sup> lys2Δ<sup>r</sup> ura3Δ<sup>r</sup> arg4<sup>r</sup> rad24Δ::HphMX4<sup>r</sup> mus81Δ::KanMX6<sup>r</sup> mlh3Δ::KanMX6<sup>r</sup></i>                                                                                                                                                            |
| MC101xMC103 | SK1        | <i>ho::LYS2<sup>r</sup> lys2Δ<sup>r</sup> ura3Δ<sup>r</sup> arg4<sup>r</sup> leu2<sup>r</sup> rad24Δ::HphMX4<sup>r</sup> sml1Δ::URA3<sup>r</sup></i>                                                                                                                                                                        |
| MC59xMC61   | BY474      | <i>his4<sup>r</sup> ura3Δ<sup>r</sup> leu2Δ<sup>r</sup> met15Δ<sup>r</sup> sml1Δ::URA3<sup>r</sup> rad24Δ::HphMX4<sup>r</sup></i>                                                                                                                                                                                           |
| VG120xVG121 | SK1        | <i>ho::LYS2<sup>r</sup> lys2Δ<sup>r</sup> ura3Δ<sup>r</sup> arg4Δ<sup>r</sup> leu2Δ::hisG<sup>r</sup> his4XΔ::LEU2<sup>r</sup> nuc1Δ::LEU2<sup>r</sup> ade2-bgl<sup>r</sup> PCLB2-MEC1::KanMX6<sup>r</sup></i>                                                                                                              |
| MC152xMC153 | S288c      | <i>ade8Δ<sup>r</sup> PCLB2-MEC1::KanMX6<sup>r</sup></i>                                                                                                                                                                                                                                                                     |
| MC163xMC164 | SK1        | <i>ho::LYS2<sup>r</sup> lys2Δ<sup>r</sup> ura3Δ<sup>r</sup> arg4Δ<sup>r</sup> leu2Δ::hisG<sup>r</sup> nuc1Δ::LEU2<sup>r</sup> PCLB2-MEC1::KanMX6<sup>r</sup> msh2Δ::KanMX6<sup>r</sup></i>                                                                                                                                  |
| MC171xMC172 | S288c      | <i>ade8Δ<sup>r</sup> PCLB2-MEC1::KanMX6<sup>r</sup> msh2::HphMX4<sup>r</sup></i>                                                                                                                                                                                                                                            |
| MC243xMC242 | SK1        | <i>ho::LYS2<sup>r</sup> lys2Δ<sup>r</sup> ura3Δ<sup>r</sup> arg4<sup>r</sup> leu2<sup>r</sup> mus81Δ::KanMX6<sup>r</sup> PCLB2-MEC1::KanMX6<sup>r</sup></i>                                                                                                                                                                 |
| MC2xMC3     | SK1        | <i>ho::LYS2<sup>r</sup> lys2Δ<sup>r</sup> arg4Δ<sup>r</sup> leu2Δ::hisG<sup>r</sup> his4XΔ::LEU2<sup>r</sup> nuc1Δ::LEU2<sup>r</sup> trp1Δ::hisG<sup>r</sup> ura3Δ::PGPD1-GAL4(848)-ER::URA3<sup>r</sup> PCLB2-MEC1::KanMX6<sup>r</sup> PGAL1-NDT80::TRP1<sup>r</sup></i>                                                   |
| MJ848       | SK1        | <i>ho::LYS2<sup>r</sup> lys2Δ<sup>r</sup> arg4Δ<sup>r</sup> leu2Δ::hisG<sup>r</sup> trp1Δ::hisG<sup>r</sup> his4XΔ::LEU2<sup>r</sup> nuc1Δ::LEU2<sup>r</sup> ura3Δ::PGPD1-GAL4(848)-ER::URA3<sup>r</sup> PGAL1-NDT80::TRP1<sup>r</sup> rad24Δ::hphMX<sup>r</sup></i>                                                        |
| MC288xMC289 | SK1        | <i>ho::LYS2<sup>r</sup> lys2Δ<sup>r</sup> arg4<sup>r</sup> leu2<sup>r</sup> trp1Δ::hisG<sup>r</sup> his4XΔ::LEU2<sup>r</sup> nuc1Δ::LEU2<sup>r</sup> ura3Δ::PGPD1-GAL4(848)-ER::URA3<sup>r</sup> PGAL1-NDT80::TRP<sup>r</sup> mus81Δ::KanMX6<sup>r</sup> rad24Δ::HphMX4<sup>r</sup></i>                                     |
| MC286xMC287 | SK1        | <i>ho::LYS2<sup>r</sup> lys2Δ<sup>r</sup> arg4<sup>r</sup> leu2Δ<sup>r</sup> trp1Δ::hisG<sup>r</sup> his4XΔ::LEU2<sup>r</sup> nuc1Δ::LEU2<sup>r</sup> ura3Δ::PGPD1-GAL4(848)-ER::URA3<sup>r</sup> PGAL1-NDT80::TRP<sup>r</sup> mus81Δ::KanMX6<sup>r</sup></i>                                                               |
| MC292xMC297 | SK1/S288c  | <i>ho::LYS2<sup>r</sup> ho lys2Δ/LYS2 ade8Δ/ADE8 ura3Δ/URA3 arg4Δ/ARG4 leu2Δ/LEU2 msh2Δ::KanMX6<sup>r</sup> mus81::KanMX6<sup>r</sup> rad24::HphMX4<sup>r</sup></i>                                                                                                                                                         |
| MC307xMC309 | SK1        | <i>ho::LYS2<sup>r</sup> lys2Δ<sup>r</sup> ura3Δ<sup>r</sup> arg4Δ<sup>r</sup> leu2Δ::hisG<sup>r</sup> trp1<sup>r</sup>::hisG<sup>r</sup> his4XΔ::LEU2<sup>r</sup> nuc1Δ::LEU2<sup>r</sup> ura3Δ::PGPD1-GAL4(848)-ER::URA3<sup>r</sup> PGAL1-NDT80::TRP1<sup>r</sup>/rad24Δ::hphMX<sup>r</sup> mlh3Δ::KanMX6<sup>r</sup></i> |
| MC303xMC304 | SK1        | <i>ho::LYS2<sup>r</sup> lys2Δ<sup>r</sup> ura3Δ<sup>r</sup> arg4Δ<sup>r</sup> leu2Δ::hisG<sup>r</sup> his4XΔ::LEU2<sup>r</sup> nuc1Δ::LEU2<sup>r</sup> PCLB2-MEC1::KanMX6<sup>r</sup> mlh3Δ::KanMX6<sup>r</sup></i>                                                                                                         |
| MC333xMC304 | SK1        | <i>ho::LYS2<sup>r</sup> lys2Δ<sup>r</sup> ura3Δ<sup>r</sup> arg4Δ<sup>r</sup> leu2Δ::hisG<sup>r</sup> his4XΔ::LEU2<sup>r</sup> nuc1Δ::LEU2<sup>r</sup> PCLB2-MEC1::KanMX6<sup>r</sup> mlh3Δ::KanMX6<sup>r</sup> mus81::hphMX<sup>r</sup></i>                                                                                |
| MJ848       | SK1        | <i>ho::LYS2<sup>r</sup> lys2Δ<sup>r</sup> arg4<sup>r</sup> leu2Δ::hisG<sup>r</sup> trp1Δ::hisG<sup>r</sup> his4XΔ::LEU2<sup>r</sup> nuc1Δ::LEU2<sup>r</sup> ura3Δ::PGPD1GAL4(848)-ER::URA3<sup>r</sup> PGAL1-NDT80::TRP1<sup>r</sup> rad24Δ::HphMX4<sup>r</sup></i>                                                         |
| MC4         | SK1        | <i>ho::LYS2<sup>r</sup> lys2Δ<sup>r</sup> arg4Δ<sup>r</sup> leu2Δ::hisG<sup>r</sup> his4XΔ::LEU2<sup>r</sup> nuc1Δ::LEU2<sup>r</sup> trp1Δ::hisG<sup>r</sup> ura3Δ::pGPD1GAL4(848)-ER::URA3<sup>r</sup> PCLB2-MEC1::Kan<sup>r</sup> PGAL1-NDT80::TRP1<sup>r</sup></i>                                                       |
